# Supplementary material for: Comparison between Tail Suspension Swing Test and Standard Rotation Test in Revealing Early Motor Behavioral Changes and Neurodegeneration in 6-OHDA Hemiparkinsonian Rats
Source: PubMed Central journal article supplement (PMC7216013; doi:10.3390/ijms21082874), 2020-04-20
Supplement: ijms-21-02874-s001.pdf [file ijms-21-02874-s001.pdf]

**Table S1.** Summary of the swings assessed by the Tail Suspension Swing Test (TSST) before (day 0) and after (days 1 to 21) the lesion for the 6-OHDA and SHAM groups, in drug-free (FREE) and after apomorphine (APO) administration for the single (S) and repeated (R) apomorphine administration protocols.

| Days | 6-OHDA             |                                      |                   |                                      |                    |                                      |                     |                                      | SHAM |                                      |     |                                      |      |                                      |      |                                      |
|------|--------------------|--------------------------------------|-------------------|--------------------------------------|--------------------|--------------------------------------|---------------------|--------------------------------------|------|--------------------------------------|-----|--------------------------------------|------|--------------------------------------|------|--------------------------------------|
|      | FREE               |                                      |                   |                                      | APO                |                                      |                     |                                      | FREE |                                      |     |                                      | APO  |                                      |      |                                      |
|      | S                  | 25 <sup>th</sup><br>75 <sup>th</sup> | R                 | 25 <sup>th</sup><br>75 <sup>th</sup> | S                  | 25 <sup>th</sup><br>75 <sup>th</sup> | R                   | 25 <sup>th</sup><br>75 <sup>th</sup> | S    | 25 <sup>th</sup><br>75 <sup>th</sup> | R   | 25 <sup>th</sup><br>75 <sup>th</sup> | S    | 25 <sup>th</sup><br>75 <sup>th</sup> | R    | 25 <sup>th</sup><br>75 <sup>th</sup> |
| 0    | 0.0                | -2.0<br>2.0                          | /                 | /                                    | 0.0                | -2.0<br>2.0                          | /                   | /                                    | 0.0  | -2.0<br>2.0                          | /   | /                                    | 0.0  | -2.0<br>2.0                          | /    | /                                    |
| 1    | 10.0* <sup>#</sup> | 8.0<br>10.0                          | /                 | /                                    | -5.0* <sup>#</sup> | -7.0<br>-4.0                         | /                   | /                                    | 0.0  | -2.0<br>2.2                          | /   | /                                    | 0.0  | -0.5<br>1.0                          | /    | /                                    |
| 3    | 10.0* <sup>#</sup> | 7.0<br>10.0                          | 5.0* <sup>#</sup> | 3.8<br>8.0                           | -8.0*              | -9.0<br>-3.0                         | -9.0* <sup>#</sup>  | -10.0<br>-5.5                        | 0.0  | 0.0<br>0.0                           | 0.5 | -1.5<br>2.0                          | 0.0  | 0.0<br>0.0                           | 1.5  | -0.5<br>3.8                          |
| 5    | 9.0* <sup>#</sup>  | 9.0<br>10.0                          | 6.0* <sup>#</sup> | 0.5<br>7.8                           | -10.0*             | -10.0<br>-3.0                        | -10.0* <sup>#</sup> | -10.0<br>-10.0                       | 0.0  | 0.0<br>0.0                           | 0.5 | 2.5<br>2.0                           | 0.0  | 0.0<br>0.0                           | -1.5 | -2.5<br>1.5                          |
| 7    | 9.0*               | 7.0<br>10.0                          | 6.0* <sup>#</sup> | 2.5<br>7.5                           | -9.0* <sup>#</sup> | -10.0<br>-5.0                        | -10.0* <sup>#</sup> | -10.0<br>-9.5                        | 0.0  | 0.0<br>0.0                           | 0.0 | -1.5<br>1.2                          | 1.0  | 1.0<br>1.0                           | 0.0  | -1.8<br>1.8                          |
| 14   | 4.5                | 1.8<br>8.0                           | 4.0               | -2.0<br>9.0                          | -8.5* <sup>#</sup> | -9.8<br>-5.8                         | -10.0* <sup>#</sup> | -10.0<br>-9.0                        | 0.0  | 0.0<br>0.0                           | 1.0 | -0.2<br>2.2                          | 0.0  | 0.0<br>0.0                           | 0.0  | -2.2<br>2.0                          |
| 21   | 4.0                | -3.0<br>6.5                          | -4.0              | -7.0<br>0.0                          | -8.0* <sup>#</sup> | -8.5<br>-6.0                         | -10.0* <sup>#</sup> | -10.0<br>-10.0                       | 0.0  | -2.0<br>2.5                          | 0.0 | -3.5<br>1.5                          | -1.0 | -2.0<br>2.5                          | 0.0  | -2.0<br>3.0                          |

Data are presented as median  $\pm$  (25<sup>th</sup>, 75<sup>th</sup>) percentile.

\* Symbol indicating a significant ( $p < 0.05$ ) difference between 6-OHDA and SHAM groups.

# Symbol indicating a significant ( $p < 0.05$ ) difference between time points with respect to pre-surgery condition (day 0).

Positive values indicate ipsilateral swings; negative values indicate contralateral swings.

9 **Table S2.** Summary of the turns/min assessed by the Rotational Test (RT) before (day 0) and after (days 1 to 21) the lesion for the 6-OHDA and SHAM groups, in drug-free (FREE) and after  
 10 apomorphine (APO) administration for the single (S) and repeated (R) apomorphine administration protocols.

11

| Days | 6-OHDA             |                                      |                  |                                      |                     |                                      |                      |                                      | SHAM |                                      |      |                                      |     |                                      |     |                                      |
|------|--------------------|--------------------------------------|------------------|--------------------------------------|---------------------|--------------------------------------|----------------------|--------------------------------------|------|--------------------------------------|------|--------------------------------------|-----|--------------------------------------|-----|--------------------------------------|
|      | FREE               |                                      |                  |                                      | APO                 |                                      |                      |                                      | FREE |                                      |      |                                      | APO |                                      |     |                                      |
|      | S                  | 25 <sup>th</sup><br>75 <sup>th</sup> | R                | 25 <sup>th</sup><br>75 <sup>th</sup> | S                   | 25 <sup>th</sup><br>75 <sup>th</sup> | R                    | 25 <sup>th</sup><br>75 <sup>th</sup> | S    | 25 <sup>th</sup><br>75 <sup>th</sup> | R    | 25 <sup>th</sup><br>75 <sup>th</sup> | S   | 25 <sup>th</sup><br>75 <sup>th</sup> | R   | 25 <sup>th</sup><br>75 <sup>th</sup> |
| 0    | 0.0                | 0.0<br>0.0                           | /                | /                                    | 0.0                 | 0.0<br>0.0                           | /                    | /                                    | 0.0  | 0.0<br>0.0                           | /    | /                                    | 0.0 | 0.0<br>0.0                           | /   | /                                    |
| 1    | 0.2 <sup>*,#</sup> | -0.4<br>0.0                          | /                | /                                    | -3.6 <sup>*,#</sup> | -4.6<br>-2.4                         | /                    | /                                    | 0.0  | 0.0<br>0.1                           | /    | /                                    | 0.0 | 0.0<br>0.0                           | /   | /                                    |
| 3    | 0.3                | -0.6<br>0.0                          | 0.2 <sup>#</sup> | -0.7<br>0.0                          | -3.8                | -3.9<br>-2.8                         | -7.4 <sup>*,#</sup>  | -9.4<br>-5.1                         | -0.2 | -0.2<br>-0.2                         | 0.0  | 0.0<br>0.1                           | 0.0 | 0.0<br>0.0                           | 0.0 | 0.0<br>0.1                           |
| 5    | 0.3                | -0.9<br>0.0                          | 0.2 <sup>#</sup> | -0.4<br>0.0                          | -8.2 <sup>#</sup>   | -9.6<br>-0.3                         | -11.2 <sup>*,#</sup> | -13.8<br>-9.4                        | -0.1 | -0.1<br>-0.1                         | 0.0  | 0.0<br>0.0                           | 0.0 | 0.0<br>0.0                           | 0.0 | 0.0<br>0.0                           |
| 7    | 0.1                | -0.4<br>0.0                          | 0.1              | -0.4<br>0.0                          | -10.8 <sup>#</sup>  | -10.9<br>-5.4                        | -14.4 <sup>*,#</sup> | -16.0<br>-7.5                        | 0.0  | 0.0<br>0.0                           | -0.1 | -0.1<br>0.1                          | 0.1 | 0.1<br>0.1                           | 0.0 | -0.2<br>0.1                          |
| 14   | 0.3 <sup>#</sup>   | -0.5<br>-0.3                         | 0.6 <sup>#</sup> | -0.8<br>0.1                          | -8.9 <sup>#</sup>   | -12.3<br>-7.9                        | -12.5 <sup>*,#</sup> | -13.6<br>-9.9                        | 0.1  | 0.1<br>0.1                           | 0.0  | 0.0<br>0.1                           | 0.1 | 0.1<br>0.1                           | 0.0 | 0.0<br>0.2                           |
| 21   | 0.1                | -0.6<br>0.0                          | 0.2              | -0.6<br>-0.1                         | -8.8 <sup>#</sup>   | -10.8<br>-1.6                        | -11.2 <sup>*,#</sup> | -12.2<br>-7.4                        | 0.0  | 0.0<br>0.0                           | 0.2  | 0.0<br>0.4                           | 0.0 | 0.0<br>0.0                           | 0.0 | -0.1<br>0.3                          |

12

Data are presented as median  $\pm$  (25<sup>th</sup>, 75<sup>th</sup>) percentile.

13

\* Symbol indicating a significant ( $p < 0.05$ ) difference between 6-OHDA and SHAM groups.

14

# Symbol indicating a significant ( $p < 0.05$ ) difference between time points with respect to pre-surgery condition (day 0).

15

Positive values indicate ipsilateral turns/min; negative values indicate contralateral turns/min.

16
